# Supplementary material
Source: PubMed Central journal article supplement (PMC2572655)
Supplement: supp_179_10_1007_v2_1.pdf [file supp_179_10_1007_v2_1.pdf]

**Appendix 1:** Codes used to define ambulatory care sensitive conditions related to chronic kidney disease

| Ambulatory care sensitive condition | ICD-9-CM | ICD-10-CA    |
|-------------------------------------|----------|--------------|
| Diabetes with ketoacidosis          | 250.1    | E11.10       |
|                                     |          | E10.10       |
|                                     |          | E11.12       |
|                                     |          | E10.12       |
| Diabetes with hyperosmolarity       | 250.2    | E11.00 + E87 |
|                                     |          | E10.00 + E87 |
| Volume overload                     | 276.6    | E87.7        |
| Hyperkalemia                        | 276.7    | E87.5        |
| Malignant hypertension              | 401.0    | I10.1        |
|                                     | 402.00   |              |
|                                     | 402.01   |              |
|                                     | 403.0    |              |
|                                     | 404.0    |              |
|                                     | 405.0    |              |
| Heart failure                       | 428.x    | I09.9        |
|                                     | 398.91   | I11.0,       |
|                                     | 402.01   | I13.0        |
|                                     | 402.11   | I13.2        |
|                                     | 402.91   | I25.5        |
|                                     | 404.01   | I42.0        |
|                                     | 404.03   | I42.5–I42.9  |
|                                     | 404.11   | I43.x        |
|                                     | 404.13   | I50.x        |
|                                     | 404.91   |              |
|                                     | 404.93   |              |
| 425.4–425.9                         |          |              |

Note: ICD-9-CM = the International Statistical Classification of Diseases, ninth revision, Clinical Modification; ICD-10-CA = The International Statistical Classification of Diseases and Related Health Problems, 10th Revision, Canada.
