# Supplementary material
Source: PubMed Central journal article supplement (PMC2572655)
Supplement: supp_179_10_1007_v2_2.pdf [file supp_179_10_1007_v2_2.pdf]

**Appendix 2:** Rate ratios for admission to hospital for ambulatory care sensitive conditions related to chronic kidney disease among status Aboriginal people

| Variable                                      | Rate ratio       |
|-----------------------------------------------|------------------|
| Status Aboriginal                             | 1.58 (1.30–1.92) |
| Age, years                                    |                  |
| 18 – 60                                       | Ref              |
| 61 – 70                                       | 1.04 (0.92–1.17) |
| 71 – 80                                       | 1.55 (1.39–1.73) |
| > 80                                          | 2.48 (2.23–2.76) |
| Female                                        | 0.74 (0.69–0.78) |
| Diabetes mellitus                             | 2.32 (2.17–2.48) |
| Estimated GFR, mL/min/1.73 m <sup>2</sup>     |                  |
| 30–59                                         | Ref              |
| < 30                                          | 2.78 (2.58–2.99) |
| Rural residence                               | 1.55 (1.43–1.68) |
| Income quintile                               |                  |
| 1st (lowest)                                  | Ref              |
| 2nd                                           | 0.99 (0.90–1.08) |
| 3rd                                           | 0.87 (0.79–0.96) |
| 4th                                           | 0.87 (0.78–0.96) |
| 5th (highest)                                 | 0.82 (0.74–0.91) |
| Non-ambulatory care sensitive hospitalization | 4.53 (4.21–4.87) |

Note: eGFR = estimated glomerular filtration rate.
