# Supplementary material
Source: PubMed Central journal article supplement (PMC2572655)
Supplement: supp_179_10_1007_v2_3.pdf [file supp_179_10_1007_v2_3.pdf]

**Appendix 3:** Rates and rate ratios for all-cause hospital admissions among Aboriginal and non-Aboriginal people with chronic kidney disease

| Analysis   | Rate per 100 person years (95% CI) |                  | Rate ratio (95% CI) |
|------------|------------------------------------|------------------|---------------------|
|            | Aboriginal*                        | Non-Aboriginal   |                     |
| Unadjusted | 106.1 (101.1–111.5)                | 43.1 (42.8–43.5) | 2.46 (2.34–2.59)    |
| Adjusted†  | 99.4 (94.5–104.5)                  | 38.8 (38.4–39.1) | 2.54 (2.42–2.68)    |
| Adjusted‡  | 75.8 (71.8–80.0)                   | 37.4 (37.1–37.8) | 2.02 (1.91–2.13)    |

Note: CI = confidence interval.

\*Includes people registered under the federal Indian Act (status Aboriginal). Aboriginal people who are not registered under federal Indian Act (e.g., unregistered Aboriginals and Metis people) were included in the non-Aboriginal group.

†Adjusted for age, sex, diabetes, baseline estimated glomerular filtration rate.

‡Adjusted for age, sex, diabetes, baseline estimated glomerular filtration rate, median household income quintile, and rural location of residence.
